# Supplementary material
Source: PubMed Central journal article supplement (PMC4441865)

**Table S1: Proportions of pSLE patients having high titer anti-matrigel antibodies, subdivided into groups either without or with clinical evidence meeting each particular ACR criteria, at any time in their disease course <sup>1</sup>**

| Antibody Subtype | ACR Criterion        | Proportion of patients having high titer Ab |            |                              |
|------------------|----------------------|---------------------------------------------|------------|------------------------------|
|                  |                      | without                                     | with       | <i>P</i> -value <sup>2</sup> |
| <b>IgG</b>       | Malar rash           | 3/4 (75%)                                   | 5/6 (83%)  | 1.00                         |
|                  | Discoid rash         | 7/8 (88%)                                   | 1/2 (50%)  | 0.38                         |
|                  | Photosensitivity     | 5/7 (71%)                                   | 3/3 (100%) | 1.00                         |
|                  | Mouth ulcers         | 5/7 (71%)                                   | 3/3 (100%) | 1.00                         |
|                  | Arthritis            | 1/1 (100%)                                  | 7/9 (78%)  | 1.00                         |
|                  | Serositis            | 6/7 (86%)                                   | 2/3 (67%)  | 1.00                         |
|                  | Neurologic disorder  | 5/7 (71%)                                   | 3/3 (100%) | 1.00                         |
|                  | Kidney disorder      | 5/6 (83%)                                   | 3/4 (75%)  | 1.00                         |
|                  | Hematologic disorder | 3/3 (100%)                                  | 5/7 (71%)  | 1.00                         |
| <b>IgM</b>       | Malar rash           | 4/4 (100%)                                  | 5/6 (83%)  | 1.00                         |
|                  | Discoid rash         | 8/8 (100%)                                  | 1/2 (50%)  | 0.20                         |
|                  | Photosensitivity     | 6/7 (86%)                                   | 3/3 (100%) | 1.00                         |
|                  | Mouth ulcers         | 6/7 (86%)                                   | 3/3 (100%) | 1.00                         |
|                  | Arthritis            | 1/1 (100%)                                  | 8/9 (89%)  | 1.00                         |
|                  | Serositis            | 6/7 (86%)                                   | 3/3 (100%) | 1.00                         |
|                  | Neurologic disorder  | 6/7 (86%)                                   | 3/3 (100%) | 1.00                         |
|                  | Kidney disorder      | 5/6 (83%)                                   | 4/4 (100%) | 1.00                         |
|                  | Hematologic disorder | 3/3 (100%)                                  | 6/7 (86%)  | 1.00                         |
| <b>IgA</b>       | Malar rash           | 1/4 (25%)                                   | 2/6 (33%)  | 1.00                         |
|                  | Discoid rash         | 2/7 (29%)                                   | 1/2 (50%)  | 1.00                         |
|                  | Photosensitivity     | 1/7 (14%)                                   | 2/3 (67%)  | 0.18                         |
|                  | Mouth ulcers         | 1/7 (14%)                                   | 2/3 (67%)  | 0.18                         |
|                  | Arthritis            | 1/1 (100%)                                  | 2/9 (22%)  | 0.30                         |
|                  | Serositis            | 2/7 (29%)                                   | 1/3 (33%)  | 1.00                         |
|                  | Neurologic disorder  | 3/7 (43%)                                   | 0/3 (0%)   | 0.48                         |
|                  | Kidney disorder      | 2/6 (33%)                                   | 1/4 (25%)  | 1.00                         |
|                  | Hematologic disorder | 2/3 (67%)                                   | 1/7 (14%)  | 0.18                         |
| <b>IgG3</b>      | Malar rash           | 1/4 (25%)                                   | 2/6 (33%)  | 1.00                         |
|                  | Discoid rash         | 2/8 (25%)                                   | 1/2 (50%)  | 1.00                         |
|                  | Photosensitivity     | 3/7 (43%)                                   | 0/3 (0%)   | 0.48                         |
|                  | Mouth ulcers         | 3/7 (43%)                                   | 0/3 (0%)   | 0.48                         |
|                  | Arthritis            | 1/1 (100%)                                  | 2/9 (22%)  | 0.30                         |
|                  | Serositis            | 2/7 (29%)                                   | 1/3 (33%)  | 1.00                         |
|                  | Neurologic disorder  | 2/7 (29%)                                   | 1/3 (33%)  | 1.00                         |
|                  | Kidney disorder      | 1/6 (17%)                                   | 2/4 (50%)  | 0.50                         |
|                  | Hematologic disorder | 1/3 (33%)                                   | 2/7 (29%)  | 1.00                         |

<sup>1</sup> Number of patients with high titer anti-matrigel antibodies, defined as end-point titer >1:40, divided by the total number of patients, without or with each ACR criterion.

<sup>2</sup> *P*-value comparing the proportions of patients with high anti-matrigel titer between groups with and without ACR criteria using Fisher's exact test.

**Table S2: Proportions of samples from pSLE patients having high titer anti-matrigel antibodies, subdivided into groups either without or with clinical findings suggestive of renal injury, at the time of sampling <sup>1</sup>**

| Antibody Subtype | Clinical Finding   | Proportion of patients having high titer Ab |            |                              |
|------------------|--------------------|---------------------------------------------|------------|------------------------------|
|                  |                    | without                                     | with       | <i>P</i> -value <sup>2</sup> |
| IgG              | Hypocomplementemia | 3/8 (38%)                                   | 5/9 (56%)  | 0.64                         |
|                  | Proteinuria        | 5/12 (42%)                                  | 3/5 (60%)  | 0.62                         |
|                  | Hematuria          | 6/14 (43%)                                  | 2/3 (67%)  | 0.58                         |
|                  | Anti-ds DNA Ab +   | 5/9 (56%)                                   | 3/8 (38%)  | 0.64                         |
|                  | Anti-RNP Ab +      | 6/15 (40%)                                  | 2/2 (100%) | 0.21                         |
| IgM              | Hypocomplementemia | 4/8 (50%)                                   | 6/9 (67%)  | 0.35                         |
|                  | Proteinuria        | 5/12 (42%)                                  | 5/5 (100%) | 0.04                         |
|                  | Hematuria          | 8/14 (57%)                                  | 2/3 (67%)  | 1.00                         |
|                  | Anti-ds DNA Ab +   | 2/9 (22%)                                   | 8/8 (100%) | < 0.01                       |
|                  | Anti-RNP Ab +      | 8/15 (53%)                                  | 2/2 (100%) | 0.49                         |
| IgA              | Hypocomplementemia | 2/8 (25%)                                   | 1/9 (11%)  | 0.58                         |
|                  | Proteinuria        | 2/12 (17%)                                  | 1/5 (20%)  | 1.00                         |
|                  | Hematuria          | 2/14 (14%)                                  | 1/3 (33%)  | 0.46                         |
|                  | Anti-ds DNA Ab +   | 2/9 (22%)                                   | 1/8 (13%)  | 1.00                         |
|                  | Anti-RNP Ab +      | 1/15 (7%)                                   | 2/2 (100%) | 0.02                         |
| IgG3             | Hypocomplementemia | 2/8 (25%)                                   | 3/9 (33%)  | 1.00                         |
|                  | Proteinuria        | 2/12 (17%)                                  | 3/5 (60%)  | 0.12                         |
|                  | Hematuria          | 4/14 (29%)                                  | 1/3 (33%)  | 1.00                         |
|                  | Anti-ds DNA Ab +   | 2/9 (22%)                                   | 3/8 (38%)  | 0.62                         |
|                  | Anti-RNP Ab +      | 3/15 (20%)                                  | 2/2 (100%) | 0.07                         |
| All Isotypes     | Hypocomplementemia | 1/8 (13%)                                   | 0/9 (0%)   | 0.47                         |
|                  | Proteinuria        | 1/12 (8%)                                   | 0/5 (0%)   | 1.00                         |
|                  | Hematuria          | 1/14 (7%)                                   | 0/3 (0%)   | 1.00                         |
|                  | Anti-ds DNA Ab +   | 0/9 (0%)                                    | 1/8 (13%)  | 0.47                         |
|                  | Anti-RNP Ab +      | 1/15 (7%)                                   | 0/2 (0%)   | 1.00                         |

<sup>1</sup> Number (and percentage) of patients with high titer anti-matrigel antibodies, defined as end-point titer >1:40, divided by the total number of patients without or with each clinical finding.

<sup>2</sup> *P*-value comparing the proportions of patients with high anti-matrigel titer between groups without and with each clinical finding, using Fisher's exact test.

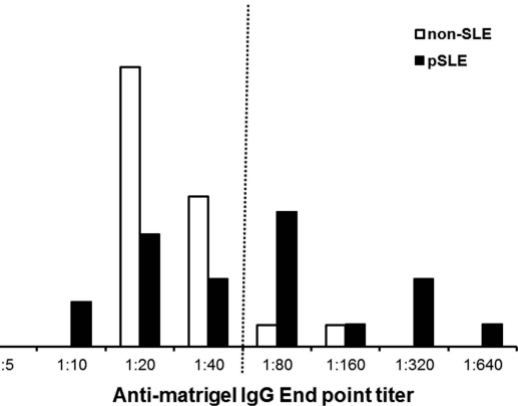

Supplement: NIHMS682251-supplement-01.pdf [file NIHMS682251-supplement-01.pdf]
